# Supplementary material for: Block copolymer–cyclodextrin supramolecular assemblies as soft templates for the synthesis of titania materials with controlled crystallinity, porosity and photocatalytic activity
Source: Royal Society of Chemistry journal article supplement (doi:10.1039/c4ra05994h), 2014-01-01
Supplement: c4ra05994h1.pdf [file c4ra05994h1.pdf]

*Supporting Material for*

**Block Copolymer-Cyclodextrin Supramolecular  
Assemblies as Soft Templates for the Synthesis of Titania  
Materials with Controlled Crystallinity, Porosity and  
Photocatalytic Activity**

Anthony Lannoy,<sup>a</sup> Rudina Blea,<sup>\*a</sup> Cécile Machut,<sup>a</sup> Eric Monflier<sup>a</sup> and Anne Ponchel<sup>a</sup>

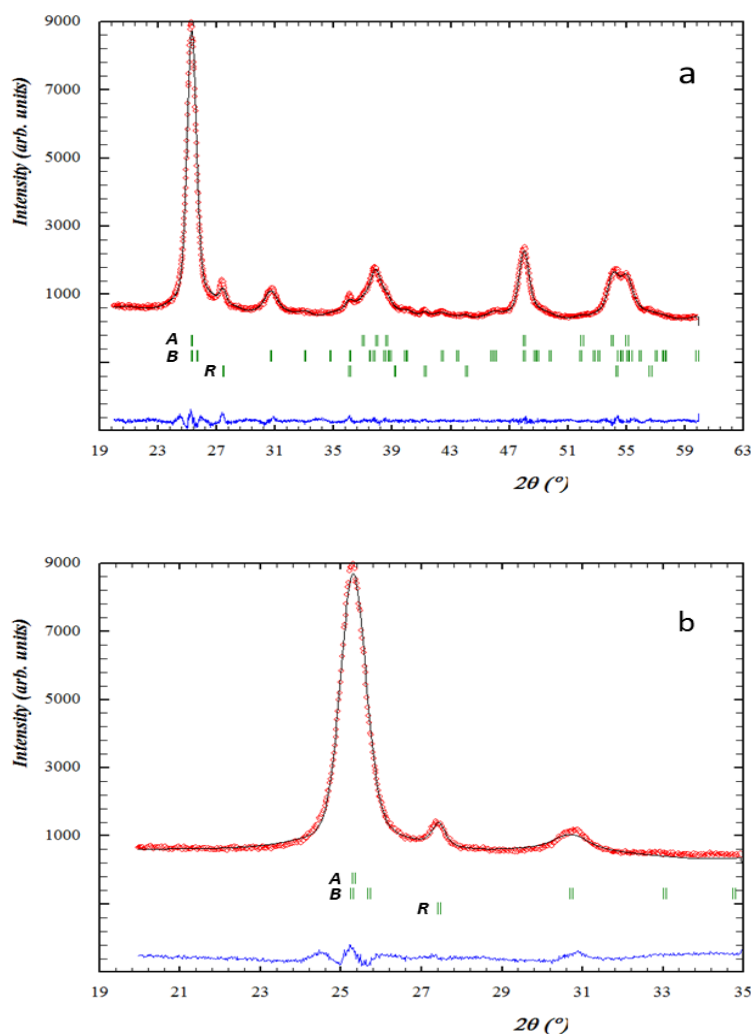

**Fig. S1** Observed (red scatter) and calculated (black line) XRD patterns resulting from pattern matching (a) and Rietveld refinement (b) of TiO<sub>2</sub>. Green lines: JCPDS of anatase (A), brookite (B) and rutile (R). Blue line: difference profile between the experimental and the calculated patterns. The  $\chi^2$  obtained for this sample was 1.72.

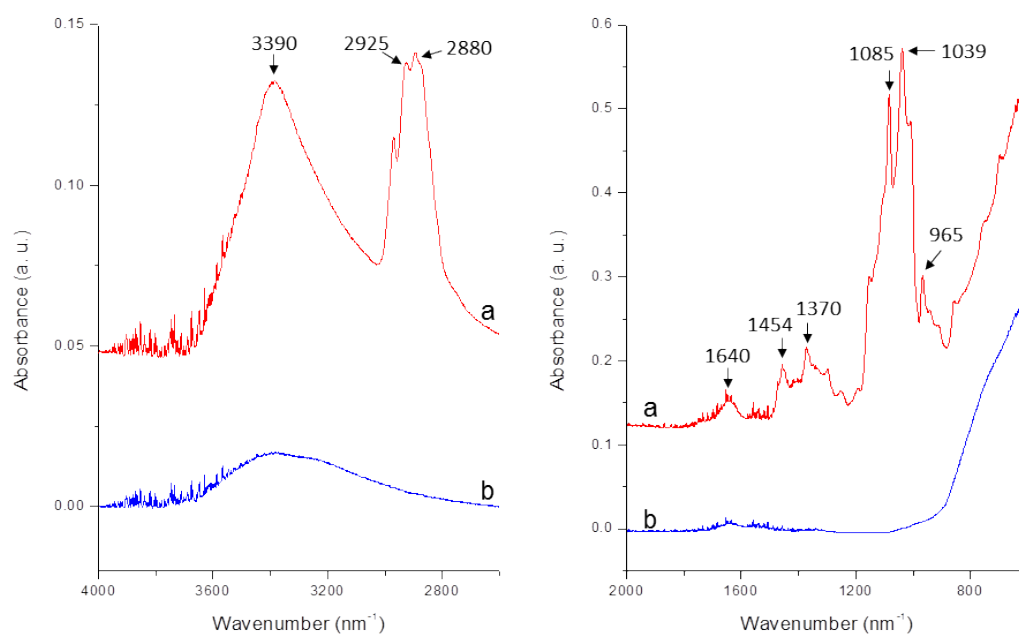

**Fig. S2** ATR-FTIR spectra of the P27RB198 sample before calcination (a), and after calcination at 500 °C (b).

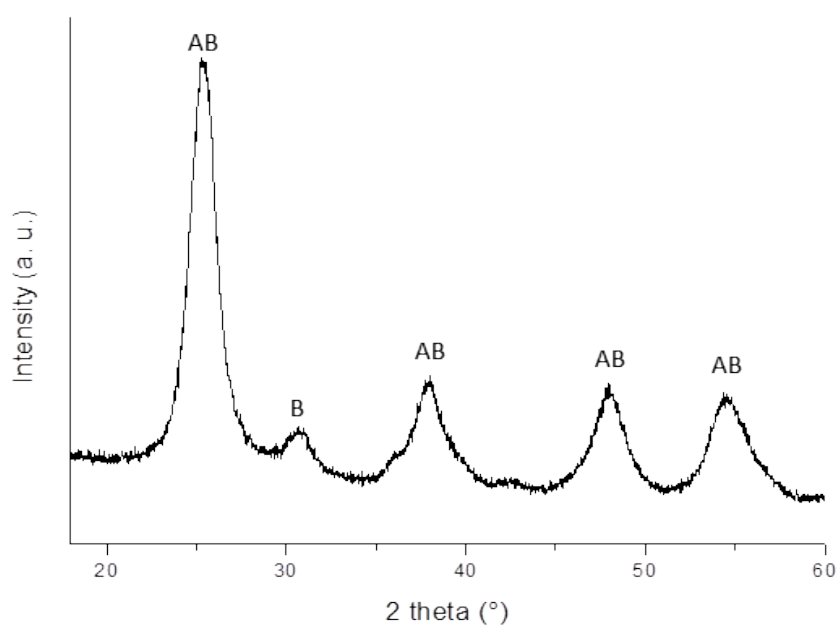

**Fig. S3** XRD pattern of the sol-gel titania xerogel prepared without template and dried at 60 °C.

| Sample                   | Anatase |          | Brookite |          | Rutile  |        |
|--------------------------|---------|----------|----------|----------|---------|--------|
|                          | cs (nm) | ct (%)   | cs (nm)  | ct (%)   | cs (nm) | ct (%) |
| Sol-gel TiO <sub>2</sub> | 6.6±0.5 | 67.8±5.4 | 5.3±0.4  | 32.2±2.6 | -       | -      |

**Table S1.** Structural and textural characteristics of titania xerogel prepared without template and dried at 60 °C.

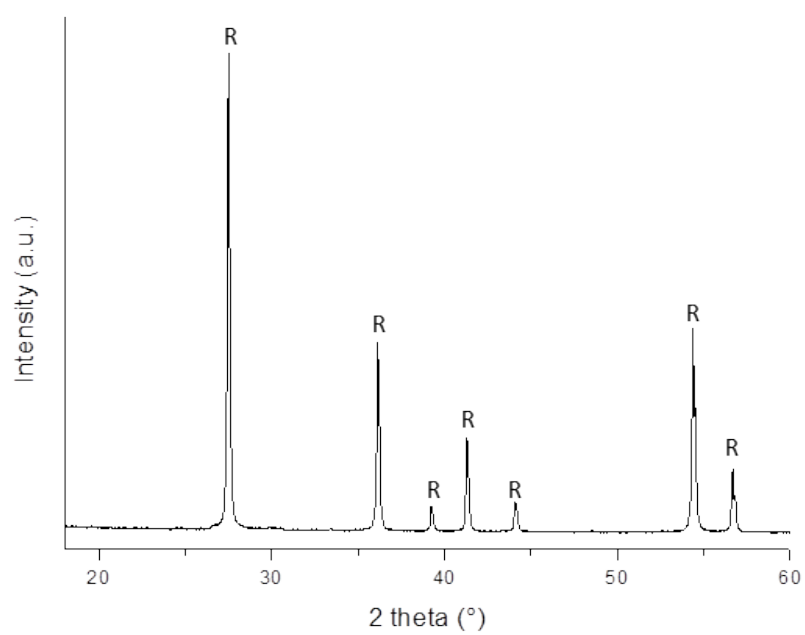

**Fig. S4** XRD pattern of the sol-gel titania material prepared without template and calcined at 600 °C for 2 hours.
